# Supplementary material for: Low lattice thermal conductivity in Pb5Bi6Se14, Pb3Bi2S6, and PbBi2S4: promising thermoelectric materials in the cannizzarite, lillianite, and galenobismuthite homologous series
Source: Royal Society of Chemistry journal article supplement (doi:10.1039/c4ta05135a), 2014-01-01
Supplement: c4ta05135a1.pdf [file c4ta05135a1.pdf]

## Supplementary Information

# Low Lattice Thermal Conductivity in $\text{Pb}_5\text{Bi}_6\text{Se}_{14}$ , $\text{Pb}_3\text{Bi}_2\text{S}_6$ , and $\text{PbBi}_2\text{S}_4$ : Promising Thermoelectric Materials in the Cannizzarite, Lillianite, and Galenobismuthite Homologous Series

Michihiro Ohta<sup>1,2</sup>, Duck Young Chung<sup>1</sup>, Masaru Kunii<sup>2</sup>, Mercuri G. Kanatzidis<sup>1,3</sup>

<sup>1</sup>Materials Science Division, Argonne National Laboratory, Argonne, Illinois 60439, USA

<sup>2</sup>Energy Technology Research Institute, National Institute of Advanced Industrial Science and Technology (AIST), Tsukuba, Ibaraki 305-8568, JAPAN

<sup>3</sup>Department of Chemistry, Northwestern University, Evanston, Illinois 60208, USA

\*Corresponding Author

E-mail: m-kanatzidis@northwestern.edu (M.G.K)

The density ( $d$ ) of the sintered compacts is summarized in **Table S1**. The theoretical density was calculated from lattice parameters (**Table 1**). The room-temperature Hall coefficient ( $R_H$ ) of the sintered compacts of  $\text{Pb}_5\text{Bi}_6\text{Se}_{14}$ ,  $\text{Pb}_3\text{Bi}_2\text{S}_6$ , and  $\text{PbBi}_2\text{S}_4$  is shown in **Table S2**. The thermal diffusivity ( $D$ ) and heat capacity ( $C_p$ ) of the  $\text{Pb}_5\text{Bi}_6\text{Se}_{14}$ ,  $\text{Pb}_3\text{Bi}_2\text{S}_6$ , and  $\text{PbBi}_2\text{S}_4$  sintered compacts are shown in **Figures S1** and **S2**, respectively. The scanning electron microscopy micrographs of three sintered compacts of different sizes were observed on the fractured sections parallel to the pressure direction in each system and are shown in **Figure S3–S5**.

**Table S1.** Density ( $d$ ) of the sintered compacts of  $\text{Pb}_5\text{Bi}_6\text{Se}_{14}$ ,  $\text{Pb}_3\text{Bi}_2\text{S}_6$ , and  $\text{PbBi}_2\text{S}_4$ .

| Sample                                 | Sintered $d$ ( $\text{g cm}^{-3}$ ) | Theoretical $d$ ( $\text{g cm}^{-3}$ ) |
|----------------------------------------|-------------------------------------|----------------------------------------|
| $\text{Pb}_5\text{Bi}_6\text{Se}_{14}$ | 7.79                                | 7.84                                   |
| $\text{Pb}_3\text{Bi}_2\text{S}_6$     | 7.09                                | 7.10                                   |
| $\text{PbBi}_2\text{S}_4$              | 7.11                                | 7.14                                   |

**Table S2.** Room-temperature Hall coefficient ( $R_H$ ) of the sintered compacts of  $\text{Pb}_5\text{Bi}_6\text{Se}_{14}$ ,  $\text{Pb}_3\text{Bi}_2\text{S}_6$ , and  $\text{PbBi}_2\text{S}_4$ .

| Sample                                 | $R_H$ ( $10^{-8} \text{ m}^3 \text{ C}^{-1}$ ) |
|----------------------------------------|------------------------------------------------|
| $\text{Pb}_5\text{Bi}_6\text{Se}_{14}$ | -12.9                                          |
| $\text{Pb}_3\text{Bi}_2\text{S}_6$     | -5.15                                          |
| $\text{PbBi}_2\text{S}_4$              | -13.6                                          |

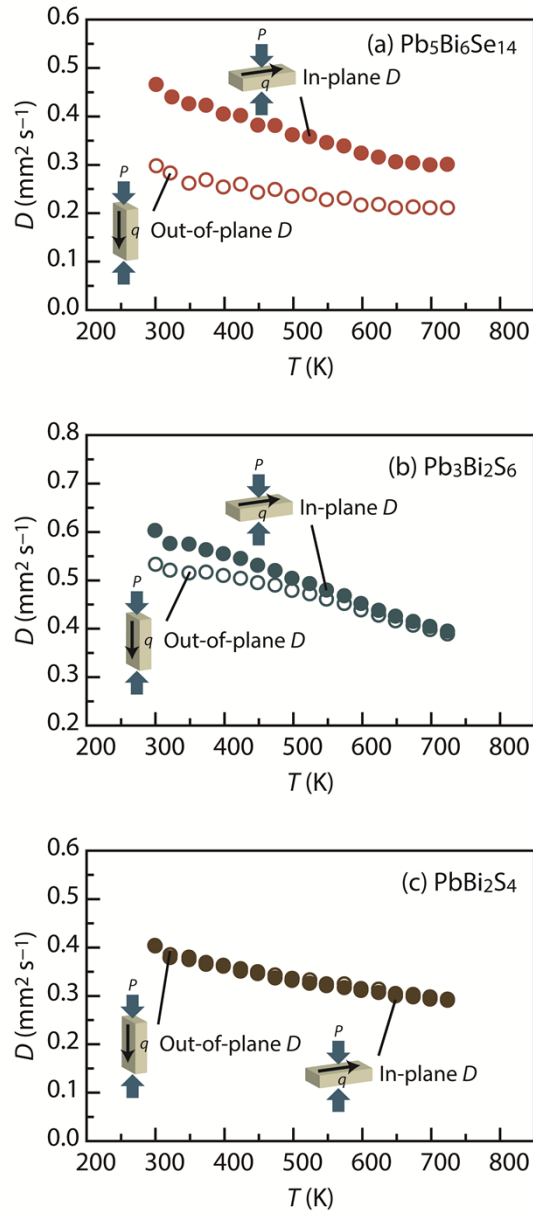

**Figure S1.** Temperature dependence of the thermal diffusivity ( $D$ ) for sintered compacts of (a)  $\text{Pb}_5\text{Bi}_6\text{Se}_{14}$ , (b)  $\text{Pb}_3\text{Bi}_2\text{S}_6$ , and (c)  $\text{PbBi}_2\text{S}_4$  measured perpendicular (in-plane) and parallel (out-of-plane) to the pressing direction.

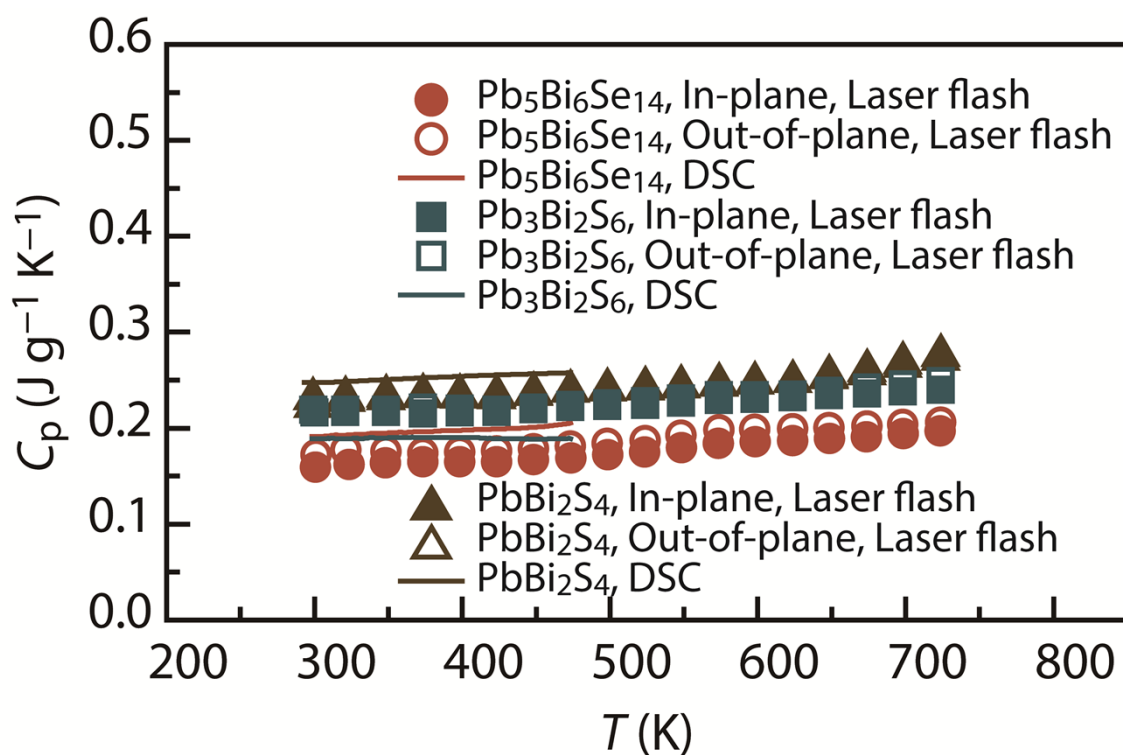

**Figure S2.** Temperature dependence of the heat capacity ( $C_p$ ) of the sintered compacts of  $Pb_5Bi_6Se_{14}$ ,  $Pb_3Bi_2S_6$ , and  $PbBi_2S_4$ . The heat capacity was indirectly derived using standard sample by using laser flash diffusivity method. The heat capacity was also measured using a differential scanning calorimetry (DSC).

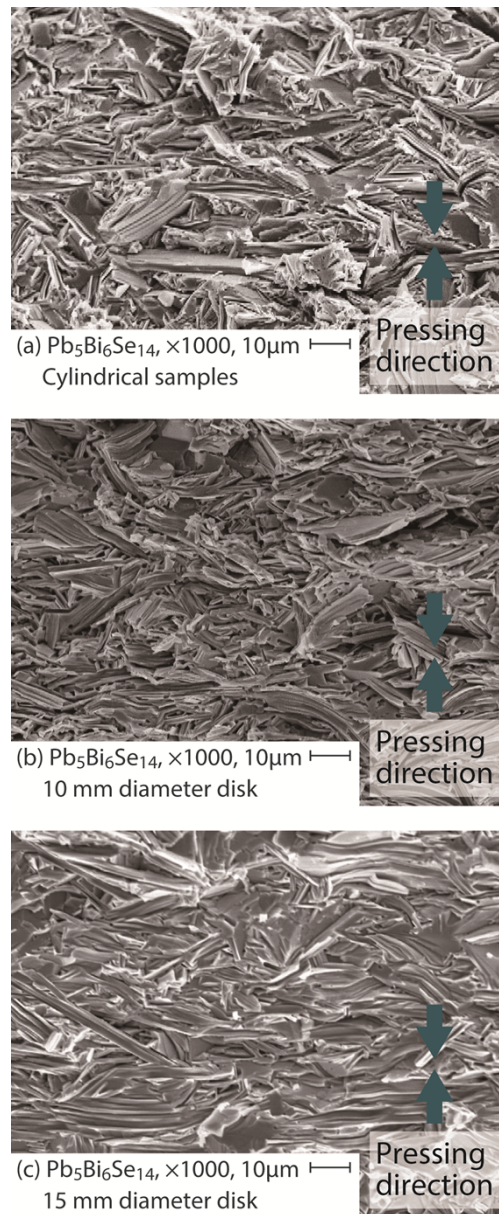

**Figure S3.** Scanning electron microscopy micrographs of the fractured section for the three  $\text{Pb}_5\text{Bi}_6\text{Se}_{14}$  sintered compacts with different sizes; (a) cylindrical sample of  $\sim 10$  mm diameter  $\times$   $\sim 11$  mm length, (b) disk of  $\sim 10$  mm diameter  $\times$   $\sim 2$  mm thickness, and (c) disk of  $\sim 15$  mm diameter  $\times$   $\sim 2$  mm thickness. The samples were fractured parallel to the pressing direction.

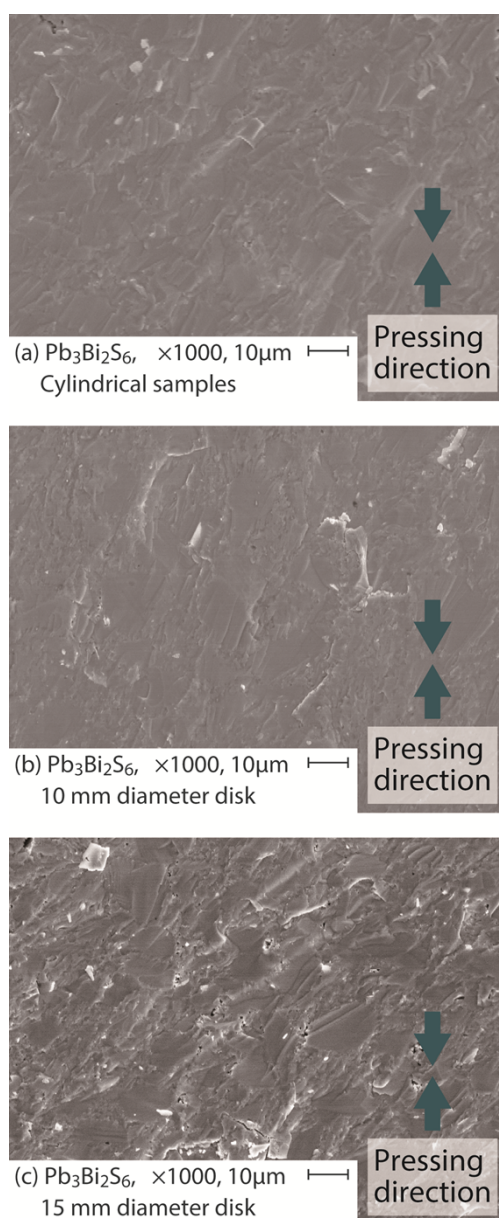

**Figure S4.** Scanning electron microscopy micrographs of the fractured section for the three  $\text{Pb}_3\text{Bi}_2\text{S}_6$  sintered compacts with different sizes; (a) cylindrical sample of  $\sim 10$  mm diameter  $\times$   $\sim 11$  mm length, (b) disk of  $\sim 10$  mm diameter  $\times$   $\sim 2$  mm thickness, and (c) disk of  $\sim 15$  mm diameter  $\times$   $\sim 2$  mm thickness. The samples were fractured parallel to the pressing direction.

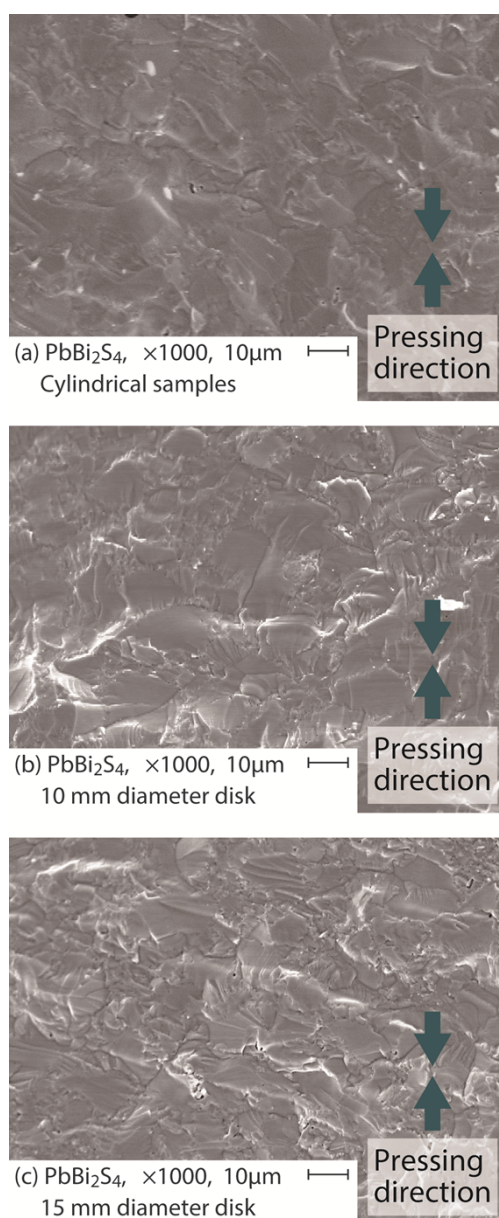

**Figure S5.** Scanning electron microscopy micrographs of the fractured section for the three  $\text{PbBi}_2\text{S}_4$  sintered compacts with different sizes; (a) cylindrical sample of  $\sim 10$  mm diameter  $\times$   $\sim 11$  mm length, (b) disk of  $\sim 10$  mm diameter  $\times$   $\sim 2$  mm thickness, and (c) disk of  $\sim 15$  mm diameter  $\times$   $\sim 2$  mm thickness. The samples were fractured parallel to the pressing direction.
